# Supplementary material
Source: publisher figshare collection journal article supplement (https://acs.figshare.com/ndownloader/files/4541974)
Supplement: Supplementary file 1 [file 4541974]

 
data_for 1 
 
_audit_creation_method            SHELXL-97 
_chemical_name_systematic 
; 
 ? 
; 
_chemical_name_common             ? 
_chemical_melting_point           ? 
_chemical_formula_moiety          'C74 H62 Cl10 O14 Sb4 Si4' 
_chemical_formula_sum 
 'C74 H62 Cl10 O14 Sb4 Si4' 
_chemical_formula_weight          2129.10 
 
loop_ 
 _atom_type_symbol 
 _atom_type_description 
 _atom_type_scat_dispersion_real 
 _atom_type_scat_dispersion_imag 
 _atom_type_scat_source 
 'C'  'C'   0.0033   0.0016 
 'International Tables Vol C Tables 4.2.6.8 and 6.1.1.4' 
 'H'  'H'   0.0000   0.0000 
 'International Tables Vol C Tables 4.2.6.8 and 6.1.1.4' 
 'O'  'O'   0.0106   0.0060 
 'International Tables Vol C Tables 4.2.6.8 and 6.1.1.4' 
 'Si'  'Si'   0.0817   0.0704 
 'International Tables Vol C Tables 4.2.6.8 and 6.1.1.4' 
 'Cl'  'Cl'   0.1484   0.1585 
 'International Tables Vol C Tables 4.2.6.8 and 6.1.1.4' 
 'Sb'  'Sb'  -0.5866   1.5461 
 'International Tables Vol C Tables 4.2.6.8 and 6.1.1.4' 
 
_symmetry_cell_setting            'Monoclinic'
_symmetry_space_group_name_H-M     'C2/c  ' 
 _symmetry_space_group_name_Hall	'-C 2yc'
loop_ 
 _symmetry_equiv_pos_as_xyz 
 'x, y, z' 
 '-x, y, -z+1/2' 
 'x+1/2, y+1/2, z' 
 '-x+1/2, y+1/2, -z+1/2' 
 '-x, -y, -z' 
 'x, -y, z-1/2' 
 '-x+1/2, -y+1/2, -z' 
 'x+1/2, -y+1/2, z-1/2' 
 
_cell_length_a                    24.828(13) 
_cell_length_b                    15.261(8) 
_cell_length_c                    24.943(13) 
_cell_angle_alpha                 90.00 
_cell_angle_beta                  111.925(7) 
_cell_angle_gamma                 90.00 
_cell_volume                      8767(8) 
_cell_formula_units_Z             4 
_cell_measurement_temperature     298(2) 
_cell_measurement_reflns_used      8132 
_cell_measurement_theta_min        2.57
_cell_measurement_theta_max       26.47
 
_exptl_crystal_description        'Block'
_exptl_crystal_colour             'colorless' 
_exptl_crystal_size_max           0.26 
_exptl_crystal_size_mid           0.26 
_exptl_crystal_size_min           0.18 
_exptl_crystal_density_meas       ? 
_exptl_crystal_density_diffrn     1.613 
_exptl_crystal_density_method     'not measured' 
_exptl_crystal_F_000              4192 
_exptl_absorpt_coefficient_mu     1.635 
_exptl_absorpt_correction_type    Empirical
_exptl_absorpt_correction_T_min   0.6758 
_exptl_absorpt_correction_T_max   0.7573 
_exptl_absorpt_process_details    SADABAS
 
_exptl_special_details 
; 
 ? 
; 
 
_diffrn_ambient_temperature       298(2) 
_diffrn_radiation_wavelength      0.71073 
_diffrn_radiation_type            MoK\a 
_diffrn_radiation_source          'fine-focus sealed tube' 
_diffrn_radiation_monochromator   graphite 
_diffrn_measurement_device_type   'CCD area detector' 
_diffrn_measurement_method        'phi and omega scans' 
_diffrn_detector_area_resol_mean  ? 
_diffrn_standards_number          ? 
_diffrn_standards_interval_count  ? 
_diffrn_standards_interval_time   ? 
_diffrn_standards_decay_%         ? 
_diffrn_reflns_number             33146 
_diffrn_reflns_av_R_equivalents   0.0270 
_diffrn_reflns_av_sigmaI/netI     0.0239 
_diffrn_reflns_limit_h_min        -30 
_diffrn_reflns_limit_h_max        27 
_diffrn_reflns_limit_k_min        -16 
_diffrn_reflns_limit_k_max        18 
_diffrn_reflns_limit_l_min        -30 
_diffrn_reflns_limit_l_max        30 
_diffrn_reflns_theta_min          1.66 
_diffrn_reflns_theta_max          26.05 
_reflns_number_total              8578 
_reflns_number_gt                 7151 
_reflns_threshold_expression      >2sigma(I) 
 
_computing_data_collection        'Bruker SMART' 
_computing_cell_refinement        'Bruker SMART' 
_computing_data_reduction          'Bruker SAINT' 
_computing_structure_solution     'SHELXS-97 (Sheldrick, 1990)' 
_computing_structure_refinement   'SHELXL-97 (Sheldrick, 1997)' 
_computing_molecular_graphics     'Bruker SHELXTL' 
_computing_publication_material  'Bruker SHELXTL'
 
_refine_special_details 
; 
 Refinement of F^2^ against ALL reflections.  The weighted R-factor wR and 
 goodness of fit S are based on F^2^, conventional R-factors R are based 
 on F, with F set to zero for negative F^2^. The threshold expression of 
 F^2^ > 2sigma(F^2^) is used only for calculating R-factors(gt) etc. and is 
 not relevant to the choice of reflections for refinement.  R-factors based 
 on F^2^ are statistically about twice as large as those based on F, and R- 
 factors based on ALL data will be even larger. 
; 
 
_refine_ls_structure_factor_coef  Fsqd  
_refine_ls_matrix_type            full 
_refine_ls_weighting_scheme       calc  
_refine_ls_weighting_details 
 'calc w=1/[\s^2^(Fo^2^)+(0.1140P)^2^+15.8502P] where P=(Fo^2^+2Fc^2^)/3' 
_atom_sites_solution_primary      direct 
_atom_sites_solution_secondary    difmap 
_atom_sites_solution_hydrogens    geom 
_refine_ls_hydrogen_treatment     mixed 
_refine_ls_extinction_method      none 
_refine_ls_extinction_coef        ? 
_refine_ls_number_reflns          8578 
_refine_ls_number_parameters      487 
_refine_ls_number_restraints      0 
_refine_ls_R_factor_all           0.0581 
_refine_ls_R_factor_gt            0.0497 
_refine_ls_wR_factor_ref          0.1691 
_refine_ls_wR_factor_gt           0.1572 
_refine_ls_goodness_of_fit_ref    1.062 
_refine_ls_restrained_S_all       1.062 
_refine_ls_shift/su_max           0.227 
_refine_ls_shift/su_mean          0.000 
 
loop_ 
 _atom_site_label 
 _atom_site_type_symbol 
 _atom_site_fract_x 
 _atom_site_fract_y 
 _atom_site_fract_z 
 _atom_site_U_iso_or_equiv 
 _atom_site_adp_type 
 _atom_site_occupancy 
 _atom_site_symmetry_multiplicity 
 _atom_site_calc_flag 
 _atom_site_refinement_flags 
 _atom_site_disorder_assembly 
 _atom_site_disorder_group 
Sb1 Sb 0.563685(13) 0.69472(2) 0.746076(13) 0.04811(14) Uani 1 1 d . . . 
Sb2 Sb 0.473168(14) 0.54018(2) 0.680024(13) 0.04871(14) Uani 1 1 d . . . 
Si1 Si 0.56858(7) 0.60940(11) 0.62762(6) 0.0581(4) Uani 1 1 d . . . 
Si2 Si 0.5000 0.35412(14) 0.7500 0.0593(5) Uani 1 2 d S . . 
Si3 Si 0.5000 0.88086(14) 0.7500 0.0584(5) Uani 1 2 d S . . 
C1 C 0.6488(2) 0.6990(4) 0.8080(2) 0.0564(12) Uani 1 1 d . . . 
C2 C 0.6936(3) 0.6637(5) 0.7956(3) 0.0747(16) Uani 1 1 d . . . 
H2 H 0.6869 0.6362 0.7605 0.090 Uiso 1 1 calc R . . 
C3 C 0.7508(3) 0.6706(6) 0.8385(4) 0.093(2) Uani 1 1 d . . . 
H3 H 0.7822 0.6482 0.8312 0.112 Uiso 1 1 calc R . . 
C4 C 0.7596(3) 0.7100(5) 0.8906(3) 0.089(2) Uani 1 1 d . . . 
C5 C 0.7146(3) 0.7446(5) 0.9021(3) 0.0844(19) Uani 1 1 d . . . 
H5 H 0.7213 0.7710 0.9376 0.101 Uiso 1 1 calc R . . 
C6 C 0.6585(3) 0.7403(4) 0.8604(3) 0.0724(16) Uani 1 1 d . . . 
H6 H 0.6276 0.7650 0.8677 0.087 Uiso 1 1 calc R . . 
C7 C 0.5429(3) 0.6653(5) 0.5564(3) 0.0730(16) Uani 1 1 d . . . 
C8 C 0.5112(4) 0.7419(7) 0.5486(4) 0.112(3) Uani 1 1 d . . . 
H8 H 0.5047 0.7666 0.5797 0.135 Uiso 1 1 calc R . . 
C9 C 0.4884(6) 0.7834(8) 0.4939(5) 0.145(4) Uani 1 1 d . . . 
H9 H 0.4686 0.8363 0.4886 0.174 Uiso 1 1 calc R . . 
C10 C 0.4969(8) 0.7427(14) 0.4500(5) 0.186(7) Uani 1 1 d . . . 
H10 H 0.4827 0.7693 0.4139 0.223 Uiso 1 1 calc R . . 
C11 C 0.5246(9) 0.6660(11) 0.4552(5) 0.190(8) Uani 1 1 d . . . 
H11 H 0.5279 0.6393 0.4230 0.228 Uiso 1 1 calc R . . 
C12 C 0.5477(6) 0.6280(8) 0.5074(4) 0.138(4) Uani 1 1 d . . . 
H12 H 0.5674 0.5752 0.5109 0.165 Uiso 1 1 calc R . . 
C13 C 0.6334(3) 0.5398(4) 0.6397(3) 0.0677(15) Uani 1 1 d . . . 
C14 C 0.6839(3) 0.5723(6) 0.6367(4) 0.090(2) Uani 1 1 d . . . 
H14 H 0.6852 0.6308 0.6268 0.108 Uiso 1 1 calc R . . 
C15 C 0.7328(4) 0.5209(8) 0.6480(4) 0.111(3) Uani 1 1 d . . . 
H15 H 0.7663 0.5452 0.6459 0.133 Uiso 1 1 calc R . . 
C16 C 0.7322(5) 0.4378(9) 0.6618(4) 0.120(4) Uani 1 1 d . . . 
H16 H 0.7647 0.4030 0.6678 0.145 Uiso 1 1 calc R . . 
C17 C 0.6843(6) 0.4026(8) 0.6673(6) 0.151(5) Uani 1 1 d . . . 
H17 H 0.6844 0.3442 0.6781 0.181 Uiso 1 1 calc R . . 
C18 C 0.6346(4) 0.4546(5) 0.6568(5) 0.108(3) Uani 1 1 d . . . 
H18 H 0.6022 0.4306 0.6616 0.130 Uiso 1 1 calc R . . 
C19 C 0.3900(2) 0.5390(3) 0.6142(2) 0.0561(12) Uani 1 1 d . . . 
C20 C 0.3831(3) 0.5661(5) 0.5591(2) 0.0699(15) Uani 1 1 d . . . 
H20 H 0.4149 0.5863 0.5516 0.084 Uiso 1 1 calc R . . 
C21 C 0.3299(3) 0.5635(5) 0.5160(3) 0.0807(18) Uani 1 1 d . . . 
H21 H 0.3250 0.5832 0.4792 0.097 Uiso 1 1 calc R . . 
C22 C 0.2835(3) 0.5317(5) 0.5269(3) 0.0796(19) Uani 1 1 d . . . 
C23 C 0.2885(3) 0.5072(5) 0.5810(3) 0.0781(17) Uani 1 1 d . . . 
H23 H 0.2559 0.4903 0.5882 0.094 Uiso 1 1 calc R . . 
C24 C 0.3434(2) 0.5078(4) 0.6257(3) 0.0652(14) Uani 1 1 d . . . 
H24 H 0.3482 0.4875 0.6623 0.078 Uiso 1 1 calc R . . 
C25 C 0.4382(3) 0.2842(5) 0.7484(3) 0.0745(18) Uani 1 1 d . . . 
C26 C 0.3834(5) 0.2910(7) 0.7050(6) 0.141(4) Uani 1 1 d . . . 
H26 H 0.3767 0.3307 0.6749 0.169 Uiso 1 1 calc R . . 
C27 C 0.3380(5) 0.2374(10) 0.7070(9) 0.173(6) Uani 1 1 d . . . 
H27 H 0.3011 0.2446 0.6789 0.207 Uiso 1 1 calc R . . 
C28 C 0.3454(7) 0.1802(12) 0.7452(7) 0.164(7) Uani 1 1 d . . . 
H28 H 0.3143 0.1458 0.7447 0.197 Uiso 1 1 calc R . . 
C29 C 0.3975(8) 0.1683(10) 0.7865(6) 0.179(7) Uani 1 1 d . . . 
H29 H 0.4024 0.1265 0.8151 0.215 Uiso 1 1 calc R . . 
C30 C 0.4460(5) 0.2196(8) 0.7871(4) 0.132(4) Uani 1 1 d . . . 
H30 H 0.4829 0.2081 0.8142 0.159 Uiso 1 1 calc R . . 
C31 C 0.4691(3) 0.9498(4) 0.6843(3) 0.0664(15) Uani 1 1 d . . . 
C32 C 0.4788(7) 0.9337(9) 0.6368(5) 0.177(7) Uani 1 1 d . . . 
H32 H 0.5003 0.8845 0.6353 0.213 Uiso 1 1 calc R . . 
C33 C 0.4563(8) 0.9918(14) 0.5860(6) 0.220(10) Uani 1 1 d . . . 
H33 H 0.4666 0.9815 0.5543 0.264 Uiso 1 1 calc R . . 
C34 C 0.4238(4) 1.0543(8) 0.5849(5) 0.115(3) Uani 1 1 d . . . 
H34 H 0.4070 1.0877 0.5517 0.138 Uiso 1 1 calc R . . 
C35 C 0.4138(6) 1.0720(8) 0.6319(5) 0.152(5) Uani 1 1 d . . . 
H35 H 0.3919 1.1212 0.6323 0.183 Uiso 1 1 calc R . . 
C36 C 0.4346(5) 1.0200(7) 0.6810(4) 0.136(4) Uani 1 1 d . . . 
H36 H 0.4247 1.0337 0.7125 0.163 Uiso 1 1 calc R . . 
C37 C 0.6365(7) 0.8836(12) 0.6411(10) 0.204(8) Uani 1 1 d . . . 
Cl1 Cl 0.82933(10) 0.7143(2) 0.94096(13) 0.1403(11) Uani 1 1 d . . . 
Cl2 Cl 0.21428(9) 0.53037(19) 0.47292(11) 0.1223(9) Uani 1 1 d . . . 
Cl3 Cl 0.6712(6) 0.9283(8) 0.6991(3) 0.440(9) Uani 1 1 d . . . 
Cl4 Cl 0.6173(3) 0.9813(6) 0.5893(3) 0.286(3) Uani 1 1 d . . . 
Cl5 Cl 0.6789(6) 0.8307(5) 0.6140(10) 0.617(15) Uani 1 1 d . . . 
H7A H 0.7090(13) 0.753(2) 0.4248(12) 0.000(6) Uiso 1 1 d . . . 
H7B H 0.742(2) 0.719(3) 0.490(2) 0.046(13) Uiso 1 1 d . . . 
O1 O 0.55252(15) 0.5572(2) 0.74887(14) 0.0489(7) Uani 1 1 d . . . 
O2 O 0.47757(15) 0.6778(2) 0.69339(15) 0.0479(7) Uani 1 1 d . . . 
O3 O 0.58323(17) 0.6851(3) 0.67812(16) 0.0585(9) Uani 1 1 d . . . 
O4 O 0.51581(18) 0.5479(3) 0.62951(17) 0.0618(10) Uani 1 1 d . . . 
O5 O 0.47992(18) 0.4153(2) 0.69204(17) 0.0628(9) Uani 1 1 d . . . 
O6 O 0.55018(18) 0.8193(3) 0.74192(19) 0.0644(10) Uani 1 1 d . . . 
O7 O 0.7068(13) 0.7575(18) 0.4636(9) 0.59(3) Uani 1 1 d . . . 
 
loop_ 
 _atom_site_aniso_label 
 _atom_site_aniso_U_11 
 _atom_site_aniso_U_22 
 _atom_site_aniso_U_33 
 _atom_site_aniso_U_23 
 _atom_site_aniso_U_13 
 _atom_site_aniso_U_12 
Sb1 0.0444(2) 0.0476(2) 0.0536(2) -0.00130(12) 0.01987(15) -0.00161(12) 
Sb2 0.0489(2) 0.0483(2) 0.0474(2) -0.00226(12) 0.01616(15) -0.00169(13) 
Si1 0.0582(8) 0.0673(9) 0.0544(7) 0.0004(6) 0.0276(6) 0.0021(7) 
Si2 0.0632(12) 0.0449(11) 0.0684(12) 0.000 0.0230(10) 0.000 
Si3 0.0588(12) 0.0439(10) 0.0709(12) 0.000 0.0224(10) 0.000 
C1 0.045(3) 0.060(3) 0.064(3) 0.001(2) 0.020(2) -0.008(2) 
C2 0.056(3) 0.097(5) 0.074(4) 0.004(3) 0.027(3) 0.007(3) 
C3 0.042(3) 0.129(6) 0.106(5) 0.013(5) 0.026(3) 0.007(4) 
C4 0.058(4) 0.102(6) 0.083(5) 0.005(4) -0.001(3) -0.015(4) 
C5 0.076(4) 0.085(5) 0.074(4) -0.010(3) 0.008(3) -0.016(4) 
C6 0.068(4) 0.071(4) 0.070(3) -0.014(3) 0.016(3) -0.004(3) 
C7 0.076(4) 0.082(4) 0.059(3) 0.004(3) 0.022(3) -0.006(3) 
C8 0.111(6) 0.122(7) 0.087(5) 0.020(5) 0.017(5) 0.017(6) 
C9 0.160(11) 0.143(10) 0.106(8) 0.033(7) 0.020(7) 0.035(8) 
C10 0.232(17) 0.231(18) 0.065(6) 0.040(9) 0.023(8) -0.044(14) 
C11 0.33(2) 0.166(13) 0.076(6) 0.014(7) 0.073(10) 0.041(14) 
C12 0.209(12) 0.138(9) 0.069(5) -0.001(5) 0.056(6) 0.027(8) 
C13 0.066(4) 0.072(4) 0.069(3) -0.008(3) 0.031(3) 0.009(3) 
C14 0.081(5) 0.090(5) 0.113(6) -0.013(4) 0.052(4) -0.001(4) 
C15 0.068(5) 0.147(9) 0.119(7) -0.033(6) 0.037(5) -0.001(5) 
C16 0.096(7) 0.136(9) 0.123(7) -0.022(7) 0.034(6) 0.043(7) 
C17 0.145(10) 0.116(8) 0.207(13) 0.029(8) 0.084(10) 0.065(8) 
C18 0.101(6) 0.077(5) 0.158(9) 0.015(5) 0.062(6) 0.016(4) 
C19 0.051(3) 0.056(3) 0.057(3) -0.007(2) 0.015(2) -0.001(2) 
C20 0.064(3) 0.083(4) 0.061(3) 0.000(3) 0.022(3) -0.001(3) 
C21 0.074(4) 0.104(5) 0.056(3) 0.000(3) 0.014(3) 0.005(4) 
C22 0.064(4) 0.093(5) 0.063(4) -0.015(3) 0.002(3) 0.002(3) 
C23 0.062(4) 0.076(4) 0.090(4) -0.007(3) 0.020(3) -0.012(3) 
C24 0.053(3) 0.071(4) 0.068(3) -0.001(3) 0.018(3) -0.011(3) 
C25 0.080(4) 0.068(4) 0.087(4) -0.023(3) 0.044(4) -0.019(3) 
C26 0.105(7) 0.112(8) 0.177(11) 0.021(7) 0.020(7) -0.025(6) 
C27 0.094(8) 0.144(12) 0.259(19) -0.001(11) 0.040(10) -0.049(8) 
C28 0.152(12) 0.201(15) 0.167(12) -0.091(11) 0.091(10) -0.122(12) 
C29 0.252(18) 0.192(13) 0.122(9) -0.013(9) 0.102(11) -0.127(13) 
C30 0.153(9) 0.154(9) 0.090(6) -0.004(6) 0.045(6) -0.078(8) 
C31 0.062(3) 0.057(3) 0.074(4) 0.000(3) 0.018(3) -0.002(2) 
C32 0.256(16) 0.188(12) 0.128(8) 0.078(8) 0.117(10) 0.147(12) 
C33 0.210(16) 0.35(2) 0.138(11) 0.128(14) 0.108(11) 0.143(18) 
C34 0.089(6) 0.124(8) 0.106(7) 0.049(6) 0.006(5) 0.003(5) 
C35 0.175(12) 0.102(7) 0.117(8) 0.004(6) -0.018(8) 0.047(7) 
C36 0.185(11) 0.115(7) 0.077(5) -0.005(5) 0.014(6) 0.072(7) 
C37 0.122(10) 0.181(15) 0.29(2) -0.069(15) 0.053(12) -0.009(10) 
Cl1 0.0684(12) 0.164(3) 0.138(2) 0.0108(17) -0.0199(13) -0.0154(13) 
Cl2 0.0686(11) 0.163(2) 0.1000(14) -0.0133(14) -0.0097(10) 0.0008(12) 
Cl3 0.540(18) 0.451(14) 0.181(6) 0.064(7) -0.038(8) -0.207(14) 
Cl4 0.267(7) 0.354(10) 0.215(6) 0.055(6) 0.066(5) 0.032(7) 
Cl5 0.521(17) 0.149(5) 1.45(5) -0.103(13) 0.68(3) -0.062(7) 
O1 0.0459(17) 0.0504(19) 0.0487(17) 0.0012(14) 0.0158(14) 0.0016(14) 
O2 0.0457(18) 0.0474(18) 0.0509(17) 0.0013(14) 0.0185(14) -0.0003(14) 
O3 0.057(2) 0.067(2) 0.059(2) -0.0028(17) 0.0297(17) -0.0057(17) 
O4 0.064(2) 0.069(2) 0.057(2) -0.0101(17) 0.0280(18) -0.0050(18) 
O5 0.072(2) 0.045(2) 0.064(2) -0.0069(16) 0.0168(18) -0.0016(17) 
O6 0.058(2) 0.047(2) 0.090(3) 0.0033(18) 0.030(2) -0.0013(17) 
O7 0.63(5) 0.55(4) 0.31(2) -0.14(3) -0.13(3) 0.48(4) 
 
_geom_special_details 
; 
 All esds (except the esd in the dihedral angle between two l.s. planes) 
 are estimated using the full covariance matrix.  The cell esds are taken 
 into account individually in the estimation of esds in distances, angles 
 and torsion angles; correlations between esds in cell parameters are only 
 used when they are defined by crystal symmetry.  An approximate (isotropic) 
 treatment of cell esds is used for estimating esds involving l.s. planes. 
; 
 
loop_ 
 _geom_bond_atom_site_label_1 
 _geom_bond_atom_site_label_2 
 _geom_bond_distance 
 _geom_bond_site_symmetry_2 
 _geom_bond_publ_flag 
Sb1 O6 1.926(4) . ? 
Sb1 O3 1.935(4) . ? 
Sb1 O2 2.066(4) . ? 
Sb1 C1 2.102(6) . ? 
Sb1 O1 2.121(4) . ? 
Sb1 O2 2.133(4) 2_656 ? 
Sb1 Sb1 3.2406(17) 2_656 ? 
Sb2 O5 1.926(4) . ? 
Sb2 O4 1.928(4) . ? 
Sb2 O1 2.091(3) . ? 
Sb2 C19 2.103(6) . ? 
Sb2 O1 2.113(4) 2_656 ? 
Sb2 O2 2.123(4) . ? 
Sb2 Sb2 3.2385(18) 2_656 ? 
Si1 O4 1.626(4) . ? 
Si1 O3 1.646(4) . ? 
Si1 C13 1.856(6) . ? 
Si1 C7 1.856(6) . ? 
Si2 O5 1.635(4) . ? 
Si2 O5 1.635(4) 2_656 ? 
Si2 C25 1.857(7) . ? 
Si2 C25 1.857(7) 2_656 ? 
Si3 O6 1.632(4) . ? 
Si3 O6 1.632(4) 2_656 ? 
Si3 C31 1.855(6) 2_656 ? 
Si3 C31 1.855(6) . ? 
C1 C2 1.371(8) . ? 
C1 C6 1.389(8) . ? 
C2 C3 1.427(9) . ? 
C2 H2 0.9300 . ? 
C3 C4 1.374(12) . ? 
C3 H3 0.9300 . ? 
C4 C5 1.358(12) . ? 
C4 Cl1 1.719(7) . ? 
C5 C6 1.396(9) . ? 
C5 H5 0.9300 . ? 
C6 H6 0.9300 . ? 
C7 C8 1.382(12) . ? 
C7 C12 1.393(11) . ? 
C8 C9 1.416(13) . ? 
C8 H8 0.9300 . ? 
C9 C10 1.34(2) . ? 
C9 H9 0.9300 . ? 
C10 C11 1.34(2) . ? 
C10 H10 0.9300 . ? 
C11 C12 1.342(15) . ? 
C11 H11 0.9300 . ? 
C12 H12 0.9300 . ? 
C13 C18 1.366(10) . ? 
C13 C14 1.377(10) . ? 
C14 C15 1.383(12) . ? 
C14 H14 0.9300 . ? 
C15 C16 1.315(15) . ? 
C15 H15 0.9300 . ? 
C16 C17 1.357(17) . ? 
C16 H16 0.9300 . ? 
C17 C18 1.408(13) . ? 
C17 H17 0.9300 . ? 
C18 H18 0.9300 . ? 
C19 C24 1.378(8) . ? 
C19 C20 1.383(8) . ? 
C20 C21 1.358(9) . ? 
C20 H20 0.9300 . ? 
C21 C22 1.366(11) . ? 
C21 H21 0.9300 . ? 
C22 C23 1.361(10) . ? 
C22 Cl2 1.743(6) . ? 
C23 C24 1.401(9) . ? 
C23 H23 0.9300 . ? 
C24 H24 0.9300 . ? 
C25 C30 1.341(12) . ? 
C25 C26 1.392(13) . ? 
C26 C27 1.408(16) . ? 
C26 H26 0.9300 . ? 
C27 C28 1.25(2) . ? 
C27 H27 0.9300 . ? 
C28 C29 1.33(2) . ? 
C28 H28 0.9300 . ? 
C29 C30 1.433(15) . ? 
C29 H29 0.9300 . ? 
C30 H30 0.9300 . ? 
C31 C32 1.315(11) . ? 
C31 C36 1.355(11) . ? 
C32 C33 1.476(15) . ? 
C32 H32 0.9300 . ? 
C33 C34 1.243(18) . ? 
C33 H33 0.9300 . ? 
C34 C35 1.313(16) . ? 
C34 H34 0.9300 . ? 
C35 C36 1.386(15) . ? 
C35 H35 0.9300 . ? 
C36 H36 0.9300 . ? 
C37 Cl3 1.538(18) . ? 
C37 Cl5 1.658(19) . ? 
C37 Cl4 1.91(2) . ? 
O1 Sb2 2.113(4) 2_656 ? 
O2 Sb1 2.133(4) 2_656 ? 
O7 H7A 0.99(4) . ? 
O7 H7B 1.06(6) . ? 
 
loop_ 
 _geom_angle_atom_site_label_1 
 _geom_angle_atom_site_label_2 
 _geom_angle_atom_site_label_3 
 _geom_angle 
 _geom_angle_site_symmetry_1 
 _geom_angle_site_symmetry_3 
 _geom_angle_publ_flag 
O6 Sb1 O3 97.10(18) . . ? 
O6 Sb1 O2 88.33(16) . . ? 
O3 Sb1 O2 88.38(16) . . ? 
O6 Sb1 C1 96.6(2) . . ? 
O3 Sb1 C1 97.7(2) . . ? 
O2 Sb1 C1 171.56(17) . . ? 
O6 Sb1 O1 162.88(16) . . ? 
O3 Sb1 O1 91.84(15) . . ? 
O2 Sb1 O1 77.32(14) . . ? 
C1 Sb1 O1 96.58(18) . . ? 
O6 Sb1 O2 92.14(16) . 2_656 ? 
O3 Sb1 O2 162.66(15) . 2_656 ? 
O2 Sb1 O2 77.22(15) . 2_656 ? 
C1 Sb1 O2 95.73(18) . 2_656 ? 
O1 Sb1 O2 75.76(14) . 2_656 ? 
O6 Sb1 Sb1 81.32(12) . 2_656 ? 
O3 Sb1 Sb1 128.50(12) . 2_656 ? 
O2 Sb1 Sb1 40.25(10) . 2_656 ? 
C1 Sb1 Sb1 133.73(16) . 2_656 ? 
O1 Sb1 Sb1 81.69(10) . 2_656 ? 
O2 Sb1 Sb1 38.73(9) 2_656 2_656 ? 
O5 Sb2 O4 97.19(17) . . ? 
O5 Sb2 O1 89.70(15) . . ? 
O4 Sb2 O1 87.14(16) . . ? 
O5 Sb2 C19 96.66(19) . . ? 
O4 Sb2 C19 96.2(2) . . ? 
O1 Sb2 C19 172.35(17) . . ? 
O5 Sb2 O1 91.55(16) . 2_656 ? 
O4 Sb2 O1 162.23(15) . 2_656 ? 
O1 Sb2 O1 77.43(16) . 2_656 ? 
C19 Sb2 O1 98.07(19) . 2_656 ? 
O5 Sb2 O2 163.28(15) . . ? 
O4 Sb2 O2 91.91(15) . . ? 
O1 Sb2 O2 76.73(14) . . ? 
C19 Sb2 O2 96.26(17) . . ? 
O1 Sb2 O2 76.13(14) 2_656 . ? 
O5 Sb2 Sb2 81.69(11) . 2_656 ? 
O4 Sb2 Sb2 126.80(13) . 2_656 ? 
O1 Sb2 Sb2 39.86(10) . 2_656 ? 
C19 Sb2 Sb2 136.89(16) . 2_656 ? 
O1 Sb2 Sb2 39.36(10) 2_656 2_656 ? 
O2 Sb2 Sb2 81.63(9) . 2_656 ? 
O4 Si1 O3 109.4(2) . . ? 
O4 Si1 C13 108.9(3) . . ? 
O3 Si1 C13 110.3(3) . . ? 
O4 Si1 C7 107.5(3) . . ? 
O3 Si1 C7 108.0(3) . . ? 
C13 Si1 C7 112.7(3) . . ? 
O5 Si2 O5 110.3(3) . 2_656 ? 
O5 Si2 C25 109.5(3) . . ? 
O5 Si2 C25 108.9(2) 2_656 . ? 
O5 Si2 C25 108.9(2) . 2_656 ? 
O5 Si2 C25 109.5(3) 2_656 2_656 ? 
C25 Si2 C25 109.8(5) . 2_656 ? 
O6 Si3 O6 109.7(3) . 2_656 ? 
O6 Si3 C31 110.7(2) . 2_656 ? 
O6 Si3 C31 107.5(3) 2_656 2_656 ? 
O6 Si3 C31 107.5(3) . . ? 
O6 Si3 C31 110.7(2) 2_656 . ? 
C31 Si3 C31 110.9(4) 2_656 . ? 
C2 C1 C6 121.4(6) . . ? 
C2 C1 Sb1 120.0(5) . . ? 
C6 C1 Sb1 118.7(4) . . ? 
C1 C2 C3 117.8(6) . . ? 
C1 C2 H2 121.1 . . ? 
C3 C2 H2 121.1 . . ? 
C4 C3 C2 120.3(7) . . ? 
C4 C3 H3 119.9 . . ? 
C2 C3 H3 119.9 . . ? 
C5 C4 C3 121.1(6) . . ? 
C5 C4 Cl1 120.9(6) . . ? 
C3 C4 Cl1 118.0(7) . . ? 
C4 C5 C6 119.7(7) . . ? 
C4 C5 H5 120.1 . . ? 
C6 C5 H5 120.1 . . ? 
C1 C6 C5 119.8(6) . . ? 
C1 C6 H6 120.1 . . ? 
C5 C6 H6 120.1 . . ? 
C8 C7 C12 116.9(7) . . ? 
C8 C7 Si1 119.9(6) . . ? 
C12 C7 Si1 122.8(7) . . ? 
C7 C8 C9 121.1(10) . . ? 
C7 C8 H8 119.5 . . ? 
C9 C8 H8 119.5 . . ? 
C10 C9 C8 116.8(12) . . ? 
C10 C9 H9 121.6 . . ? 
C8 C9 H9 121.6 . . ? 
C11 C10 C9 123.9(11) . . ? 
C11 C10 H10 118.1 . . ? 
C9 C10 H10 118.1 . . ? 
C10 C11 C12 119.2(12) . . ? 
C10 C11 H11 120.4 . . ? 
C12 C11 H11 120.4 . . ? 
C11 C12 C7 122.0(12) . . ? 
C11 C12 H12 119.0 . . ? 
C7 C12 H12 119.0 . . ? 
C18 C13 C14 116.5(7) . . ? 
C18 C13 Si1 120.8(6) . . ? 
C14 C13 Si1 122.5(6) . . ? 
C13 C14 C15 122.1(9) . . ? 
C13 C14 H14 118.9 . . ? 
C15 C14 H14 118.9 . . ? 
C16 C15 C14 120.4(9) . . ? 
C16 C15 H15 119.8 . . ? 
C14 C15 H15 119.8 . . ? 
C15 C16 C17 120.3(9) . . ? 
C15 C16 H16 119.9 . . ? 
C17 C16 H16 119.9 . . ? 
C16 C17 C18 119.9(11) . . ? 
C16 C17 H17 120.1 . . ? 
C18 C17 H17 120.1 . . ? 
C13 C18 C17 120.7(10) . . ? 
C13 C18 H18 119.7 . . ? 
C17 C18 H18 119.7 . . ? 
C24 C19 C20 120.4(5) . . ? 
C24 C19 Sb2 119.8(4) . . ? 
C20 C19 Sb2 119.7(4) . . ? 
C21 C20 C19 120.1(6) . . ? 
C21 C20 H20 119.9 . . ? 
C19 C20 H20 119.9 . . ? 
C20 C21 C22 119.7(6) . . ? 
C20 C21 H21 120.1 . . ? 
C22 C21 H21 120.1 . . ? 
C23 C22 C21 121.5(6) . . ? 
C23 C22 Cl2 117.5(6) . . ? 
C21 C22 Cl2 120.8(6) . . ? 
C22 C23 C24 119.3(6) . . ? 
C22 C23 H23 120.4 . . ? 
C24 C23 H23 120.4 . . ? 
C19 C24 C23 118.7(6) . . ? 
C19 C24 H24 120.7 . . ? 
C23 C24 H24 120.7 . . ? 
C30 C25 C26 116.8(8) . . ? 
C30 C25 Si2 120.7(7) . . ? 
C26 C25 Si2 122.3(7) . . ? 
C25 C26 C27 119.5(12) . . ? 
C25 C26 H26 120.3 . . ? 
C27 C26 H26 120.3 . . ? 
C28 C27 C26 122.7(14) . . ? 
C28 C27 H27 118.7 . . ? 
C26 C27 H27 118.7 . . ? 
C27 C28 C29 120.5(11) . . ? 
C27 C28 H28 119.8 . . ? 
C29 C28 H28 119.8 . . ? 
C28 C29 C30 120.2(12) . . ? 
C28 C29 H29 119.9 . . ? 
C30 C29 H29 119.9 . . ? 
C25 C30 C29 120.0(12) . . ? 
C25 C30 H30 120.0 . . ? 
C29 C30 H30 120.0 . . ? 
C32 C31 C36 114.6(8) . . ? 
C32 C31 Si3 122.3(6) . . ? 
C36 C31 Si3 123.0(6) . . ? 
C31 C32 C33 121.6(11) . . ? 
C31 C32 H32 119.2 . . ? 
C33 C32 H32 119.2 . . ? 
C34 C33 C32 120.9(12) . . ? 
C34 C33 H33 119.6 . . ? 
C32 C33 H33 119.6 . . ? 
C33 C34 C35 118.4(10) . . ? 
C33 C34 H34 120.8 . . ? 
C35 C34 H34 120.8 . . ? 
C34 C35 C36 122.6(11) . . ? 
C34 C35 H35 118.7 . . ? 
C36 C35 H35 118.7 . . ? 
C31 C36 C35 121.6(10) . . ? 
C31 C36 H36 119.2 . . ? 
C35 C36 H36 119.2 . . ? 
Cl3 C37 Cl5 112.4(13) . . ? 
Cl3 C37 Cl4 101.6(10) . . ? 
Cl5 C37 Cl4 98.0(13) . . ? 
Sb2 O1 Sb2 100.77(15) . 2_656 ? 
Sb2 O1 Sb1 100.99(14) . . ? 
Sb2 O1 Sb1 103.50(15) 2_656 . ? 
Sb1 O2 Sb2 101.75(15) . . ? 
Sb1 O2 Sb1 101.02(15) . 2_656 ? 
Sb2 O2 Sb1 102.74(14) . 2_656 ? 
Si1 O3 Sb1 131.9(2) . . ? 
Si1 O4 Sb2 134.3(2) . . ? 
Si2 O5 Sb2 133.1(2) . . ? 
Si3 O6 Sb1 133.4(2) . . ? 
H7A O7 H7B 103(4) . . ? 
 
_diffrn_measured_fraction_theta_max    0.990 
_diffrn_reflns_theta_full              26.05 
_diffrn_measured_fraction_theta_full   0.990 
_refine_diff_density_max    1.720 
_refine_diff_density_min   -0.873 
_refine_diff_density_rms    0.162 
#=======end---------------------------------------------------------------------------------------------------------------------
 
data_for 2
 
_audit_creation_method            SHELXL-97 
_chemical_name_systematic 
; 
 ? 
; 
_chemical_name_common             ? 
_chemical_melting_point           ? 
_chemical_formula_moiety          'C72 H76 Br4 O22 Sb4 Si4' 
_chemical_formula_sum 
 'C72 H76 Br4 O22 Sb4 Si4' 
_chemical_formula_weight          2212.33 
 
loop_ 
 _atom_type_symbol 
 _atom_type_description 
 _atom_type_scat_dispersion_real 
 _atom_type_scat_dispersion_imag 
 _atom_type_scat_source 
 'C'  'C'   0.0033   0.0016 
 'International Tables Vol C Tables 4.2.6.8 and 6.1.1.4' 
 'H'  'H'   0.0000   0.0000 
 'International Tables Vol C Tables 4.2.6.8 and 6.1.1.4' 
 'O'  'O'   0.0106   0.0060 
 'International Tables Vol C Tables 4.2.6.8 and 6.1.1.4' 
 'Si'  'Si'   0.0817   0.0704 
 'International Tables Vol C Tables 4.2.6.8 and 6.1.1.4' 
 'Br'  'Br'  -0.2901   2.4595 
 'International Tables Vol C Tables 4.2.6.8 and 6.1.1.4' 
 'Sb'  'Sb'  -0.5866   1.5461 
 'International Tables Vol C Tables 4.2.6.8 and 6.1.1.4' 
 
_symmetry_cell_setting              'Monoclinic' 
_symmetry_space_group_name_H-M    'C2/c  ' 
_symmetry_space_group_name_Hall     '-C 2yc'  
loop_ 
 _symmetry_equiv_pos_as_xyz 
 'x, y, z' 
 '-x, y, -z+1/2' 
 'x+1/2, y+1/2, z' 
 '-x+1/2, y+1/2, -z+1/2' 
 '-x, -y, -z' 
 'x, -y, z-1/2' 
 '-x+1/2, -y+1/2, -z' 
 'x+1/2, -y+1/2, z-1/2' 
 
_cell_length_a                    24.949(4) 
_cell_length_b                    15.262(3) 
_cell_length_c                    24.924(4) 
_cell_angle_alpha                 90.00 
_cell_angle_beta                  111.458(3) 
_cell_angle_gamma                 90.00 
_cell_volume                      8833(3) 
_cell_formula_units_Z             4 
_cell_measurement_temperature     298(2) 
_cell_measurement_reflns_used      6731
_cell_measurement_theta_min       2.60
_cell_measurement_theta_max      25.05
 
_exptl_crystal_description       'Block'
_exptl_crystal_colour             'Colorless' 
_exptl_crystal_size_max           0.44 
_exptl_crystal_size_mid           0.16 
_exptl_crystal_size_min           0.05 
_exptl_crystal_density_meas       ? 
_exptl_crystal_density_diffrn     1.664 
_exptl_crystal_density_method     'not measured' 
_exptl_crystal_F_000              4336 
_exptl_absorpt_coefficient_mu     3.139 
_exptl_absorpt_correction_type    Empirical
_exptl_absorpt_correction_T_min   0.3389 
_exptl_absorpt_correction_T_max   0.8588 
_exptl_absorpt_process_details    SADABAS 
 
_exptl_special_details 
; 
 ? 
; 
 
_diffrn_ambient_temperature       298(2) 
_diffrn_radiation_wavelength      0.71073 
_diffrn_radiation_type            MoK\a 
_diffrn_radiation_source          'fine-focus sealed tube' 
_diffrn_radiation_monochromator   graphite 
_diffrn_measurement_device_type   'CCD area detector' 
_diffrn_measurement_method        'phi and omega scans'
_diffrn_detector_area_resol_mean  ? 
_diffrn_standards_number          ? 
_diffrn_standards_interval_count  ? 
_diffrn_standards_interval_time   ? 
_diffrn_standards_decay_%         ? 
_diffrn_reflns_number             41898 
_diffrn_reflns_av_R_equivalents   0.0338 
_diffrn_reflns_av_sigmaI/netI     0.0253 
_diffrn_reflns_limit_h_min        -29 
_diffrn_reflns_limit_h_max        29 
_diffrn_reflns_limit_k_min        -18 
_diffrn_reflns_limit_k_max        18 
_diffrn_reflns_limit_l_min        -29 
_diffrn_reflns_limit_l_max        29 
_diffrn_reflns_theta_min          1.60 
_diffrn_reflns_theta_max          25.11 
_reflns_number_total              7857 
_reflns_number_gt                 6201 
_reflns_threshold_expression      >2sigma(I) 
 
_computing_data_collection        'Bruker SMART'
_computing_cell_refinement        'Bruker SMART' 
_computing_data_reduction          'Bruker SAINT' 
_computing_structure_solution     'SHELXS-97 (Sheldrick, 1990)' 
_computing_structure_refinement   'SHELXL-97 (Sheldrick, 1997)' 
_computing_molecular_graphics     'Bruker SHELXTL' 
_computing_publication_material   'Bruker SHELXTL' 
 
_refine_special_details 
; 
 Refinement of F^2^ against ALL reflections.  The weighted R-factor wR and 
 goodness of fit S are based on F^2^, conventional R-factors R are based 
 on F, with F set to zero for negative F^2^. The threshold expression of 
 F^2^ > 2sigma(F^2^) is used only for calculating R-factors(gt) etc. and is 
 not relevant to the choice of reflections for refinement.  R-factors based 
 on F^2^ are statistically about twice as large as those based on F, and R- 
 factors based on ALL data will be even larger. 
; 
 
_refine_ls_structure_factor_coef  Fsqd  
_refine_ls_matrix_type            full 
_refine_ls_weighting_scheme       calc  
_refine_ls_weighting_details 
 'calc w=1/[\s^2^(Fo^2^)+(0.1234P)^2^+16.7607P] where P=(Fo^2^+2Fc^2^)/3' 
_atom_sites_solution_primary      direct 
_atom_sites_solution_secondary    difmap 
_atom_sites_solution_hydrogens    geom 
_refine_ls_hydrogen_treatment     constr
_refine_ls_extinction_method      none 
_refine_ls_extinction_coef        ? 
_refine_ls_number_reflns          7857 
_refine_ls_number_parameters      479 
_refine_ls_number_restraints      0 
_refine_ls_R_factor_all           0.0647 
_refine_ls_R_factor_gt            0.0511 
_refine_ls_wR_factor_ref          0.1841 
_refine_ls_wR_factor_gt           0.1691 
_refine_ls_goodness_of_fit_ref    1.087 
_refine_ls_restrained_S_all       1.087 
_refine_ls_shift/su_max           0.001 
_refine_ls_shift/su_mean          0.000 
 
loop_ 
 _atom_site_label 
 _atom_site_type_symbol 
 _atom_site_fract_x 
 _atom_site_fract_y 
 _atom_site_fract_z 
 _atom_site_U_iso_or_equiv 
 _atom_site_adp_type 
 _atom_site_occupancy 
 _atom_site_symmetry_multiplicity 
 _atom_site_calc_flag 
 _atom_site_refinement_flags 
 _atom_site_disorder_assembly 
 _atom_site_disorder_group 
Sb1 Sb 1.026867(18) 0.04197(3) 0.319605(17) 0.05037(17) Uani 1 1 d . . . 
Sb2 Sb 0.936991(17) 0.19643(3) 0.254332(17) 0.04992(17) Uani 1 1 d . . . 
Si1 Si 0.93277(8) 0.11119(14) 0.37247(8) 0.0604(5) Uani 1 1 d . . . 
Si2 Si 1.0000 0.38235(17) 0.2500 0.0600(6) Uani 1 2 d S . . 
Si3 Si 1.0000 -0.14399(17) 0.2500 0.0603(6) Uani 1 2 d S . . 
Br2 Br 0.66517(5) 0.21671(11) 0.06112(6) 0.1372(5) Uani 1 1 d . . . 
Br1 Br 1.29079(4) 0.02597(9) 0.52758(5) 0.1160(4) Uani 1 1 d . . . 
C1 C 1.1089(3) 0.0403(4) 0.3839(3) 0.0565(16) Uani 1 1 d . . . 
C2 C 1.1162(3) 0.0661(5) 0.4393(3) 0.0691(18) Uani 1 1 d . . . 
H2 H 1.0850 0.0853 0.4481 0.083 Uiso 1 1 calc R . . 
C3 C 1.1710(4) 0.0629(6) 0.4816(3) 0.083(2) Uani 1 1 d . . . 
H3 H 1.1769 0.0827 0.5186 0.100 Uiso 1 1 calc R . . 
C4 C 1.2161(3) 0.0307(6) 0.4690(4) 0.078(2) Uani 1 1 d . . . 
C5 C 1.2091(3) 0.0051(6) 0.4156(4) 0.077(2) Uani 1 1 d . . . 
H5 H 1.2407 -0.0155 0.4079 0.092 Uiso 1 1 calc R . . 
C6 C 1.1563(3) 0.0088(5) 0.3720(3) 0.0660(18) Uani 1 1 d . . . 
H6 H 1.1518 -0.0092 0.3350 0.079 Uiso 1 1 calc R . . 
C7 C 0.8679(3) 0.0422(5) 0.3594(3) 0.0686(19) Uani 1 1 d . . . 
C8 C 0.8653(5) -0.0434(6) 0.3412(5) 0.104(3) Uani 1 1 d . . . 
H8 H 0.8972 -0.0690 0.3365 0.125 Uiso 1 1 calc R . . 
C9 C 0.8153(7) -0.0915(10) 0.3299(7) 0.144(5) Uani 1 1 d . . . 
H9 H 0.8141 -0.1489 0.3169 0.173 Uiso 1 1 calc R . . 
C10 C 0.7703(6) -0.0598(10) 0.3366(6) 0.126(4) Uani 1 1 d . . . 
H10 H 0.7383 -0.0952 0.3303 0.151 Uiso 1 1 calc R . . 
C11 C 0.7694(5) 0.0237(10) 0.3525(5) 0.114(4) Uani 1 1 d . . . 
H11 H 0.7362 0.0477 0.3551 0.137 Uiso 1 1 calc R . . 
C12 C 0.8197(4) 0.0749(7) 0.3654(5) 0.098(3) Uani 1 1 d . . . 
H12 H 0.8199 0.1322 0.3783 0.117 Uiso 1 1 calc R . . 
C13 C 0.9587(4) 0.1673(6) 0.4444(3) 0.075(2) Uani 1 1 d . . . 
C14 C 0.9553(7) 0.1288(10) 0.4928(4) 0.147(5) Uani 1 1 d . . . 
H14 H 0.9363 0.0754 0.4891 0.176 Uiso 1 1 calc R . . 
C15 C 0.9789(9) 0.1662(13) 0.5465(6) 0.171(7) Uani 1 1 d . . . 
H15 H 0.9784 0.1364 0.5789 0.206 Uiso 1 1 calc R . . 
C16 C 1.0019(9) 0.2433(15) 0.5516(6) 0.172(7) Uani 1 1 d . . . 
H16 H 1.0139 0.2711 0.5872 0.206 Uiso 1 1 calc R . . 
C17 C 1.0090(6) 0.2840(10) 0.5074(6) 0.142(5) Uani 1 1 d . . . 
H17 H 1.0283 0.3374 0.5127 0.170 Uiso 1 1 calc R . . 
C18 C 0.9866(5) 0.2444(8) 0.4517(4) 0.111(3) Uani 1 1 d . . . 
H18 H 0.9912 0.2719 0.4205 0.133 Uiso 1 1 calc R . . 
C19 C 0.8528(3) 0.2017(5) 0.1936(3) 0.0586(16) Uani 1 1 d . . . 
C20 C 0.8087(3) 0.1639(6) 0.2073(3) 0.076(2) Uani 1 1 d . . . 
H20 H 0.8160 0.1351 0.2421 0.092 Uiso 1 1 calc R . . 
C21 C 0.7513(3) 0.1714(7) 0.1653(5) 0.095(3) Uani 1 1 d . . . 
H21 H 0.7203 0.1488 0.1731 0.114 Uiso 1 1 calc R . . 
C22 C 0.7424(4) 0.2114(6) 0.1142(4) 0.089(3) Uani 1 1 d . . . 
C23 C 0.7855(4) 0.2466(6) 0.1009(4) 0.085(2) Uani 1 1 d . . . 
H23 H 0.7780 0.2740 0.0655 0.102 Uiso 1 1 calc R . . 
C24 C 0.8414(3) 0.2412(5) 0.1412(3) 0.0727(19) Uani 1 1 d . . . 
H24 H 0.8715 0.2648 0.1325 0.087 Uiso 1 1 calc R . . 
C25 C 1.0295(3) 0.4508(5) 0.3154(3) 0.0674(19) Uani 1 1 d . . . 
C26 C 1.0202(7) 0.4312(11) 0.3630(6) 0.162(7) Uani 1 1 d . . . 
H26 H 0.9992 0.3816 0.3647 0.195 Uiso 1 1 calc R . . 
C27 C 1.0441(9) 0.4898(16) 0.4135(7) 0.198(9) Uani 1 1 d . . . 
H27 H 1.0376 0.4758 0.4469 0.237 Uiso 1 1 calc R . . 
C28 C 1.0730(5) 0.5585(10) 0.4133(6) 0.121(5) Uani 1 1 d . . . 
H28 H 1.0884 0.5934 0.4459 0.145 Uiso 1 1 calc R . . 
C29 C 1.0799(7) 0.5769(9) 0.3673(7) 0.161(7) Uani 1 1 d . . . 
H29 H 1.0989 0.6287 0.3658 0.193 Uiso 1 1 calc R . . 
C30 C 1.0608(6) 0.5245(8) 0.3184(5) 0.135(5) Uani 1 1 d . . . 
H30 H 1.0697 0.5405 0.2866 0.162 Uiso 1 1 calc R . . 
C31 C 1.0612(4) -0.2146(5) 0.2511(4) 0.074(2) Uani 1 1 d . . . 
C32 C 1.1140(6) -0.2108(8) 0.2950(6) 0.134(5) Uani 1 1 d . . . 
H32 H 1.1213 -0.1734 0.3263 0.161 Uiso 1 1 calc R . . 
C33 C 1.1570(7) -0.2683(13) 0.2894(10) 0.173(7) Uani 1 1 d . . . 
H33 H 1.1939 -0.2621 0.3168 0.207 Uiso 1 1 calc R . . 
C34 C 1.1510(8) -0.3228(13) 0.2540(8) 0.153(7) Uani 1 1 d . . . 
H34 H 1.1809 -0.3602 0.2554 0.184 Uiso 1 1 calc R . . 
C35 C 1.1000(9) -0.3280(11) 0.2124(6) 0.165(7) Uani 1 1 d . . . 
H35 H 1.0950 -0.3664 0.1820 0.198 Uiso 1 1 calc R . . 
C36 C 1.0530(6) -0.2779(9) 0.2124(5) 0.126(4) Uani 1 1 d . . . 
H36 H 1.0164 -0.2888 0.1855 0.151 Uiso 1 1 calc R . . 
O1 O 1.02277(17) 0.1799(3) 0.30629(18) 0.0491(9) Uani 1 1 d . . . 
O2 O 1.05185(17) 0.0582(3) 0.24849(17) 0.0479(9) Uani 1 1 d . . . 
O3 O 0.9849(2) 0.0494(3) 0.3705(2) 0.0630(12) Uani 1 1 d . . . 
O4 O 0.9184(2) 0.1868(3) 0.3225(2) 0.0600(11) Uani 1 1 d . . . 
O5 O 0.9498(2) 0.3205(3) 0.2575(2) 0.0655(12) Uani 1 1 d . . . 
O6 O 1.0197(2) -0.0830(3) 0.30759(19) 0.0638(12) Uani 1 1 d . . . 
O7 O 0.3806(4) 0.9791(8) 0.4082(4) 0.165(4) Uani 1 1 d . . . 
O8 O 0.6654(10) 0.9383(12) 0.2008(5) 0.291(11) Uani 1 1 d . . . 
O9 O 0.1695(6) 0.3336(7) 0.0943(8) 0.221(7) Uani 1 1 d . . . 
O10 O 0.6869(15) 0.8495(16) 0.1685(9) 0.44(2) Uani 1 1 d . . . 
O11 O 0.7988(11) 0.2299(16) 0.5327(15) 0.52(3) Uani 1 1 d . . . 
 
loop_ 
 _atom_site_aniso_label 
 _atom_site_aniso_U_11 
 _atom_site_aniso_U_22 
 _atom_site_aniso_U_33 
 _atom_site_aniso_U_23 
 _atom_site_aniso_U_13 
 _atom_site_aniso_U_12 
Sb1 0.0524(3) 0.0508(3) 0.0463(3) 0.00191(16) 0.0160(2) 0.00241(17) 
Sb2 0.0473(3) 0.0501(3) 0.0533(3) 0.00161(17) 0.0196(2) 0.00164(17) 
Si1 0.0629(11) 0.0697(12) 0.0536(10) 0.0003(9) 0.0272(9) -0.0005(9) 
Si2 0.0597(15) 0.0484(13) 0.0686(16) 0.000 0.0195(12) 0.000 
Si3 0.0672(16) 0.0471(13) 0.0649(15) 0.000 0.0221(13) 0.000 
Br2 0.0681(6) 0.1555(12) 0.1421(11) -0.0028(9) -0.0158(6) 0.0127(6) 
Br1 0.0690(6) 0.1574(11) 0.0915(7) 0.0078(7) -0.0062(5) 0.0033(6) 
C1 0.052(4) 0.058(4) 0.052(4) 0.001(3) 0.010(3) -0.001(3) 
C2 0.064(4) 0.087(5) 0.054(4) -0.005(4) 0.020(3) 0.007(4) 
C3 0.077(5) 0.107(6) 0.054(4) 0.001(4) 0.010(4) -0.001(5) 
C4 0.057(4) 0.087(6) 0.073(5) 0.014(4) 0.004(4) 0.002(4) 
C5 0.061(5) 0.087(6) 0.079(5) 0.003(4) 0.022(4) 0.010(4) 
C6 0.059(4) 0.075(5) 0.061(4) -0.004(3) 0.018(3) 0.012(3) 
C7 0.067(4) 0.075(5) 0.068(4) 0.010(4) 0.029(4) -0.009(4) 
C8 0.086(6) 0.089(7) 0.140(9) -0.017(6) 0.046(6) -0.012(5) 
C9 0.144(12) 0.128(11) 0.175(13) -0.035(9) 0.076(10) -0.062(10) 
C10 0.091(8) 0.131(11) 0.139(10) 0.029(8) 0.023(7) -0.038(8) 
C11 0.076(6) 0.142(11) 0.127(9) 0.030(8) 0.039(6) -0.007(6) 
C12 0.087(6) 0.099(7) 0.127(8) 0.017(6) 0.063(6) 0.002(5) 
C13 0.083(5) 0.085(5) 0.058(4) 0.000(4) 0.027(4) 0.005(4) 
C14 0.226(15) 0.157(12) 0.060(6) 0.000(6) 0.057(8) -0.027(11) 
C15 0.28(2) 0.154(14) 0.075(8) -0.002(8) 0.064(11) -0.015(15) 
C16 0.217(18) 0.197(18) 0.067(8) -0.024(10) 0.013(9) 0.031(15) 
C17 0.137(11) 0.133(11) 0.116(10) -0.037(9) 0.000(8) -0.026(8) 
C18 0.130(9) 0.099(8) 0.085(6) -0.016(5) 0.017(6) -0.017(7) 
C19 0.048(3) 0.065(4) 0.062(4) -0.004(3) 0.020(3) 0.004(3) 
C20 0.056(4) 0.105(6) 0.068(4) 0.004(4) 0.023(4) -0.004(4) 
C21 0.046(4) 0.125(8) 0.112(7) -0.008(6) 0.028(4) -0.001(5) 
C22 0.064(5) 0.097(6) 0.081(6) -0.007(5) -0.002(4) 0.017(4) 
C23 0.070(5) 0.087(6) 0.082(6) 0.020(4) 0.009(4) 0.011(4) 
C24 0.068(5) 0.074(5) 0.071(5) 0.018(4) 0.020(4) 0.007(4) 
C25 0.066(5) 0.059(4) 0.074(5) 0.002(3) 0.022(4) 0.005(3) 
C26 0.215(16) 0.186(14) 0.120(9) -0.070(9) 0.102(11) -0.118(13) 
C27 0.208(18) 0.31(2) 0.110(10) -0.089(14) 0.094(12) -0.102(19) 
C28 0.085(7) 0.132(10) 0.113(10) -0.057(8) -0.003(7) 0.013(7) 
C29 0.196(15) 0.103(9) 0.108(9) -0.012(8) -0.033(10) -0.048(9) 
C30 0.190(13) 0.108(8) 0.082(7) 0.002(6) 0.019(7) -0.067(9) 
C31 0.082(5) 0.066(5) 0.084(5) 0.024(4) 0.044(5) 0.015(4) 
C32 0.104(9) 0.107(9) 0.165(12) -0.010(8) 0.018(8) 0.024(7) 
C33 0.100(10) 0.163(16) 0.23(2) 0.027(14) 0.030(12) 0.053(10) 
C34 0.168(15) 0.176(15) 0.147(13) 0.067(12) 0.094(13) 0.108(13) 
C35 0.242(18) 0.179(14) 0.094(8) 0.016(9) 0.085(11) 0.117(14) 
C36 0.157(11) 0.149(10) 0.078(6) 0.009(6) 0.050(7) 0.076(9) 
O1 0.046(2) 0.052(2) 0.050(2) -0.0001(18) 0.0176(18) 0.0018(18) 
O2 0.046(2) 0.048(2) 0.049(2) -0.0019(17) 0.0156(18) 0.0002(17) 
O3 0.068(3) 0.073(3) 0.056(3) 0.007(2) 0.031(2) 0.004(2) 
O4 0.063(3) 0.067(3) 0.056(3) 0.003(2) 0.029(2) 0.009(2) 
O5 0.060(3) 0.050(3) 0.089(4) 0.000(2) 0.031(2) 0.005(2) 
O6 0.072(3) 0.053(3) 0.058(3) 0.003(2) 0.013(2) -0.001(2) 
O7 0.134(7) 0.231(12) 0.120(7) -0.040(7) 0.034(6) 0.005(7) 
O8 0.43(3) 0.263(18) 0.096(7) 0.004(9) -0.003(11) -0.160(18) 
O9 0.250(14) 0.108(7) 0.39(2) -0.047(10) 0.221(15) -0.036(8) 
O10 0.84(6) 0.29(2) 0.28(2) -0.116(19) 0.33(3) -0.31(3) 
O11 0.38(3) 0.25(2) 0.69(5) 0.23(3) -0.11(3) -0.18(2) 
 
_geom_special_details 
; 
 All esds (except the esd in the dihedral angle between two l.s. planes) 
 are estimated using the full covariance matrix.  The cell esds are taken 
 into account individually in the estimation of esds in distances, angles 
 and torsion angles; correlations between esds in cell parameters are only 
 used when they are defined by crystal symmetry.  An approximate (isotropic) 
 treatment of cell esds is used for estimating esds involving l.s. planes. 
; 
 
loop_ 
 _geom_bond_atom_site_label_1 
 _geom_bond_atom_site_label_2 
 _geom_bond_distance 
 _geom_bond_site_symmetry_2 
 _geom_bond_publ_flag 
Sb1 O3 1.921(4) . ? 
Sb1 O6 1.930(5) . ? 
Sb1 C1 2.088(7) . ? 
Sb1 O2 2.088(4) 2_755 ? 
Sb1 O2 2.098(4) . ? 
Sb1 O1 2.128(4) . ? 
Sb1 Sb1 3.2300(9) 2_755 ? 
Sb1 Sb2 3.2500(7) . ? 
Sb1 Sb2 3.3139(7) 2_755 ? 
Sb2 O5 1.917(5) . ? 
Sb2 O4 1.925(4) . ? 
Sb2 O1 2.072(4) . ? 
Sb2 C19 2.093(7) . ? 
Sb2 O1 2.113(4) 2_755 ? 
Sb2 O2 2.133(4) 2_755 ? 
Sb2 Sb2 3.2294(10) 2_755 ? 
Sb2 Sb1 3.3138(7) 2_755 ? 
Si1 O3 1.622(5) . ? 
Si1 O4 1.638(5) . ? 
Si1 C7 1.857(8) . ? 
Si1 C13 1.874(8) . ? 
Si2 O5 1.632(5) . ? 
Si2 O5 1.632(5) 2_755 ? 
Si2 C25 1.846(8) . ? 
Si2 C25 1.846(8) 2_755 ? 
Si3 O6 1.628(5) 2_755 ? 
Si3 O6 1.628(5) . ? 
Si3 C31 1.860(8) 2_755 ? 
Si3 C31 1.860(8) . ? 
Br2 C22 1.898(8) . ? 
Br1 C4 1.902(8) . ? 
C1 C2 1.383(10) . ? 
C1 C6 1.405(10) . ? 
C2 C3 1.387(11) . ? 
C2 H2 0.9300 . ? 
C3 C4 1.366(12) . ? 
C3 H3 0.9300 . ? 
C4 C5 1.337(12) . ? 
C5 C6 1.368(10) . ? 
C5 H5 0.9300 . ? 
C6 H6 0.9300 . ? 
C7 C12 1.358(12) . ? 
C7 C8 1.378(12) . ? 
C8 C9 1.385(16) . ? 
C8 H8 0.9300 . ? 
C9 C10 1.288(19) . ? 
C9 H9 0.9300 . ? 
C10 C11 1.338(18) . ? 
C10 H10 0.9300 . ? 
C11 C12 1.412(15) . ? 
C11 H11 0.9300 . ? 
C12 H12 0.9300 . ? 
C13 C18 1.345(14) . ? 
C13 C14 1.373(13) . ? 
C14 C15 1.375(18) . ? 
C14 H14 0.9300 . ? 
C15 C16 1.29(2) . ? 
C15 H15 0.9300 . ? 
C16 C17 1.33(2) . ? 
C16 H16 0.9300 . ? 
C17 C18 1.427(16) . ? 
C17 H17 0.9300 . ? 
C18 H18 0.9300 . ? 
C19 C24 1.368(10) . ? 
C19 C20 1.392(10) . ? 
C20 C21 1.436(11) . ? 
C20 H20 0.9300 . ? 
C21 C22 1.355(14) . ? 
C21 H21 0.9300 . ? 
C22 C23 1.348(14) . ? 
C23 C24 1.392(11) . ? 
C23 H23 0.9300 . ? 
C24 H24 0.9300 . ? 
C25 C26 1.324(14) . ? 
C25 C30 1.355(13) . ? 
C26 C27 1.480(19) . ? 
C26 H26 0.9300 . ? 
C27 C28 1.27(2) . ? 
C27 H27 0.9300 . ? 
C28 C29 1.251(19) . ? 
C28 H28 0.9300 . ? 
C29 C30 1.389(18) . ? 
C29 H29 0.9300 . ? 
C30 H30 0.9300 . ? 
C31 C36 1.328(14) . ? 
C31 C32 1.371(15) . ? 
C32 C33 1.43(2) . ? 
C32 H32 0.9300 . ? 
C33 C34 1.18(2) . ? 
C33 H33 0.9300 . ? 
C34 C35 1.32(2) . ? 
C34 H34 0.9300 . ? 
C35 C36 1.400(17) . ? 
C35 H35 0.9300 . ? 
C36 H36 0.9300 . ? 
O1 Sb2 2.113(4) 2_755 ? 
O2 Sb1 2.088(4) 2_755 ? 
O2 Sb2 2.133(4) 2_755 ? 
O9 O10 1.76(2) 3_445 ? 
O10 O9 1.76(2) 3 ? 
 
loop_ 
 _geom_angle_atom_site_label_1 
 _geom_angle_atom_site_label_2 
 _geom_angle_atom_site_label_3 
 _geom_angle 
 _geom_angle_site_symmetry_1 
 _geom_angle_site_symmetry_3 
 _geom_angle_publ_flag 
O3 Sb1 O6 96.8(2) . . ? 
O3 Sb1 C1 96.4(2) . . ? 
O6 Sb1 C1 96.7(2) . . ? 
O3 Sb1 O2 87.25(19) . 2_755 ? 
O6 Sb1 O2 89.12(18) . 2_755 ? 
C1 Sb1 O2 172.7(2) . 2_755 ? 
O3 Sb1 O2 162.42(18) . . ? 
O6 Sb1 O2 91.42(18) . . ? 
C1 Sb1 O2 98.0(2) . . ? 
O2 Sb1 O2 77.35(18) 2_755 . ? 
O3 Sb1 O1 92.16(18) . . ? 
O6 Sb1 O1 163.28(18) . . ? 
C1 Sb1 O1 96.3(2) . . ? 
O2 Sb1 O1 77.22(16) 2_755 . ? 
O2 Sb1 O1 76.34(16) . . ? 
O3 Sb1 Sb1 126.67(15) . 2_755 ? 
O6 Sb1 Sb1 81.65(13) . 2_755 ? 
C1 Sb1 Sb1 136.9(2) . 2_755 ? 
O2 Sb1 Sb1 39.61(11) 2_755 2_755 ? 
O2 Sb1 Sb1 39.38(11) . 2_755 ? 
O1 Sb1 Sb1 81.67(11) . 2_755 ? 
O3 Sb1 Sb2 81.07(14) . . ? 
O6 Sb1 Sb2 129.17(14) . . ? 
C1 Sb1 Sb2 134.12(18) . . ? 
O2 Sb1 Sb2 40.15(11) 2_755 . ? 
O2 Sb1 Sb2 81.68(11) . . ? 
O1 Sb1 Sb2 38.68(11) . . ? 
Sb1 Sb1 Sb2 61.513(12) 2_755 . ? 
O3 Sb1 Sb2 130.55(14) . 2_755 ? 
O6 Sb1 Sb2 130.23(14) . 2_755 ? 
C1 Sb1 Sb2 92.62(19) . 2_755 ? 
O2 Sb1 Sb2 80.22(11) 2_755 2_755 ? 
O2 Sb1 Sb2 38.81(11) . 2_755 ? 
O1 Sb1 Sb2 38.45(11) . 2_755 ? 
Sb1 Sb1 Sb2 59.540(14) 2_755 2_755 ? 
Sb2 Sb1 Sb2 58.933(18) . 2_755 ? 
O5 Sb2 O4 97.4(2) . . ? 
O5 Sb2 O1 88.57(19) . . ? 
O4 Sb2 O1 88.08(19) . . ? 
O5 Sb2 C19 95.8(2) . . ? 
O4 Sb2 C19 98.0(2) . . ? 
O1 Sb2 C19 172.0(2) . . ? 
O5 Sb2 O1 91.79(19) . 2_755 ? 
O4 Sb2 O1 162.53(18) . 2_755 ? 
O1 Sb2 O1 77.30(18) . 2_755 ? 
C19 Sb2 O1 95.8(2) . 2_755 ? 
O5 Sb2 O2 163.04(19) . 2_755 ? 
O4 Sb2 O2 91.75(17) . 2_755 ? 
O1 Sb2 O2 77.47(16) . 2_755 ? 
C19 Sb2 O2 97.0(2) . 2_755 ? 
O1 Sb2 O2 75.92(16) 2_755 2_755 ? 
O5 Sb2 Sb2 81.40(14) . 2_755 ? 
O4 Sb2 Sb2 127.91(15) . 2_755 ? 
O1 Sb2 Sb2 39.96(11) . 2_755 ? 
C19 Sb2 Sb2 134.03(19) . 2_755 ? 
O1 Sb2 Sb2 39.03(11) 2_755 2_755 ? 
O2 Sb2 Sb2 81.71(11) 2_755 2_755 ? 
O5 Sb2 Sb1 128.41(15) . . ? 
O4 Sb2 Sb1 81.25(14) . . ? 
O1 Sb2 Sb1 39.94(12) . . ? 
C19 Sb2 Sb1 135.70(19) . . ? 
O1 Sb2 Sb1 81.39(11) 2_755 . ? 
O2 Sb2 Sb1 39.14(11) 2_755 . ? 
Sb2 Sb2 Sb1 61.520(14) 2_755 . ? 
O5 Sb2 Sb1 130.55(15) . 2_755 ? 
O4 Sb2 Sb1 129.77(14) . 2_755 ? 
O1 Sb2 Sb1 80.34(12) . 2_755 ? 
C19 Sb2 Sb1 91.71(18) . 2_755 ? 
O1 Sb2 Sb1 38.78(12) 2_755 2_755 ? 
O2 Sb2 Sb1 38.06(11) 2_755 2_755 ? 
Sb2 Sb2 Sb1 59.546(12) 2_755 2_755 ? 
Sb1 Sb2 Sb1 58.946(18) . 2_755 ? 
O3 Si1 O4 110.0(3) . . ? 
O3 Si1 C7 108.8(3) . . ? 
O4 Si1 C7 109.4(3) . . ? 
O3 Si1 C13 107.1(3) . . ? 
O4 Si1 C13 107.9(3) . . ? 
C7 Si1 C13 113.6(4) . . ? 
O5 Si2 O5 109.3(4) . 2_755 ? 
O5 Si2 C25 107.5(3) . . ? 
O5 Si2 C25 110.7(3) 2_755 . ? 
O5 Si2 C25 110.7(3) . 2_755 ? 
O5 Si2 C25 107.5(3) 2_755 2_755 ? 
C25 Si2 C25 111.1(5) . 2_755 ? 
O6 Si3 O6 110.3(4) 2_755 . ? 
O6 Si3 C31 109.7(3) 2_755 2_755 ? 
O6 Si3 C31 109.0(3) . 2_755 ? 
O6 Si3 C31 109.0(3) 2_755 . ? 
O6 Si3 C31 109.7(3) . . ? 
C31 Si3 C31 109.2(5) 2_755 . ? 
C2 C1 C6 119.6(6) . . ? 
C2 C1 Sb1 119.8(5) . . ? 
C6 C1 Sb1 120.4(5) . . ? 
C1 C2 C3 118.8(7) . . ? 
C1 C2 H2 120.6 . . ? 
C3 C2 H2 120.6 . . ? 
C4 C3 C2 120.2(8) . . ? 
C4 C3 H3 119.9 . . ? 
C2 C3 H3 119.9 . . ? 
C5 C4 C3 121.1(8) . . ? 
C5 C4 Br1 119.2(7) . . ? 
C3 C4 Br1 119.7(7) . . ? 
C4 C5 C6 121.0(8) . . ? 
C4 C5 H5 119.5 . . ? 
C6 C5 H5 119.5 . . ? 
C5 C6 C1 119.2(7) . . ? 
C5 C6 H6 120.4 . . ? 
C1 C6 H6 120.4 . . ? 
C12 C7 C8 116.7(8) . . ? 
C12 C7 Si1 121.5(7) . . ? 
C8 C7 Si1 121.8(7) . . ? 
C7 C8 C9 119.9(11) . . ? 
C7 C8 H8 120.0 . . ? 
C9 C8 H8 120.0 . . ? 
C10 C9 C8 122.6(14) . . ? 
C10 C9 H9 118.7 . . ? 
C8 C9 H9 118.7 . . ? 
C9 C10 C11 120.4(12) . . ? 
C9 C10 H10 119.8 . . ? 
C11 C10 H10 119.8 . . ? 
C10 C11 C12 119.0(12) . . ? 
C10 C11 H11 120.5 . . ? 
C12 C11 H11 120.5 . . ? 
C7 C12 C11 121.3(11) . . ? 
C7 C12 H12 119.3 . . ? 
C11 C12 H12 119.3 . . ? 
C18 C13 C14 116.7(10) . . ? 
C18 C13 Si1 120.7(7) . . ? 
C14 C13 Si1 122.3(8) . . ? 
C13 C14 C15 122.5(14) . . ? 
C13 C14 H14 118.8 . . ? 
C15 C14 H14 118.8 . . ? 
C16 C15 C14 119.3(14) . . ? 
C16 C15 H15 120.4 . . ? 
C14 C15 H15 120.4 . . ? 
C15 C16 C17 122.2(14) . . ? 
C15 C16 H16 118.9 . . ? 
C17 C16 H16 118.9 . . ? 
C16 C17 C18 118.8(14) . . ? 
C16 C17 H17 120.6 . . ? 
C18 C17 H17 120.6 . . ? 
C13 C18 C17 120.3(12) . . ? 
C13 C18 H18 119.9 . . ? 
C17 C18 H18 119.9 . . ? 
C24 C19 C20 120.5(7) . . ? 
C24 C19 Sb2 120.7(5) . . ? 
C20 C19 Sb2 118.8(5) . . ? 
C19 C20 C21 117.1(8) . . ? 
C19 C20 H20 121.5 . . ? 
C21 C20 H20 121.5 . . ? 
C22 C21 C20 119.9(8) . . ? 
C22 C21 H21 120.0 . . ? 
C20 C21 H21 120.0 . . ? 
C23 C22 C21 122.6(8) . . ? 
C23 C22 Br2 120.6(8) . . ? 
C21 C22 Br2 116.7(8) . . ? 
C22 C23 C24 118.5(8) . . ? 
C22 C23 H23 120.8 . . ? 
C24 C23 H23 120.8 . . ? 
C19 C24 C23 121.3(8) . . ? 
C19 C24 H24 119.3 . . ? 
C23 C24 H24 119.3 . . ? 
C26 C25 C30 115.1(9) . . ? 
C26 C25 Si2 121.3(7) . . ? 
C30 C25 Si2 123.6(7) . . ? 
C25 C26 C27 118.5(13) . . ? 
C25 C26 H26 120.7 . . ? 
C27 C26 H26 120.7 . . ? 
C28 C27 C26 123.1(14) . . ? 
C28 C27 H27 118.4 . . ? 
C26 C27 H27 118.4 . . ? 
C29 C28 C27 117.1(13) . . ? 
C29 C28 H28 121.4 . . ? 
C27 C28 H28 121.4 . . ? 
C28 C29 C30 123.9(14) . . ? 
C28 C29 H29 118.1 . . ? 
C30 C29 H29 118.1 . . ? 
C25 C30 C29 122.2(13) . . ? 
C25 C30 H30 118.9 . . ? 
C29 C30 H30 118.9 . . ? 
C36 C31 C32 117.2(10) . . ? 
C36 C31 Si3 120.3(8) . . ? 
C32 C31 Si3 122.1(8) . . ? 
C31 C32 C33 115.6(14) . . ? 
C31 C32 H32 122.2 . . ? 
C33 C32 H32 122.2 . . ? 
C34 C33 C32 127.6(18) . . ? 
C34 C33 H33 116.2 . . ? 
C32 C33 H33 116.2 . . ? 
C33 C34 C35 116.9(15) . . ? 
C33 C34 H34 121.6 . . ? 
C35 C34 H34 121.6 . . ? 
C34 C35 C36 122.3(14) . . ? 
C34 C35 H35 118.8 . . ? 
C36 C35 H35 118.8 . . ? 
C31 C36 C35 119.5(14) . . ? 
C31 C36 H36 120.2 . . ? 
C35 C36 H36 120.2 . . ? 
Sb2 O1 Sb2 101.01(18) . 2_755 ? 
Sb2 O1 Sb1 101.38(18) . . ? 
Sb2 O1 Sb1 102.77(17) 2_755 . ? 
Sb1 O2 Sb1 101.01(17) 2_755 . ? 
Sb1 O2 Sb2 100.70(17) 2_755 2_755 ? 
Sb1 O2 Sb2 103.13(17) . 2_755 ? 
Si1 O3 Sb1 133.7(3) . . ? 
Si1 O4 Sb2 131.9(3) . . ? 
Si2 O5 Sb2 133.7(3) . . ? 
Si3 O6 Sb1 133.1(3) . . ? 
 
_diffrn_measured_fraction_theta_max    0.996 
_diffrn_reflns_theta_full              25.11 
_diffrn_measured_fraction_theta_full   0.996 
_refine_diff_density_max    1.684 
_refine_diff_density_min   -0.638 
_refine_diff_density_rms    0.175 
#======end
